# Supplementary material
Source: PubMed Central journal article supplement (PMC3201749)
Supplement: NIHMS300622-supplement-Supp_Table_S2.pdf [file NIHMS300622-supplement-Supp_Table_S2.pdf]

**Supplementary Table 2**

| <b>Affy Probeset ID</b> | <b>Gene Symbol</b>         | <b>Gene Title</b>                                                                | <b>Fold-Change</b> |
|-------------------------|----------------------------|----------------------------------------------------------------------------------|--------------------|
| 203290_at               | HLA-DQA1                   | major histocompatibility complex, class II, DQ alpha 1                           | -2.21              |
| 206079_at               | CHML                       | choroideremia-like (Rab escort protein 2)                                        | -1.83              |
| 1559011_at              | FLJ13773                   | FLJ13773                                                                         | -1.77              |
| 223758_s_at             | GTF2H2                     | general transcription factor IIH, polypeptide 2, 44kDa                           | -1.70              |
| 212978_at               | LRRC8B                     | leucine rich repeat containing 8 family, member B                                | -1.66              |
| 1557059_at              | LOC254128                  | Hypothetical protein LOC254128                                                   | -1.62              |
| 221765_at               | UGCG                       | UDP-glucose ceramide glucosyltransferase                                         | -1.62              |
| 1570585_at              | MPZL3                      | myelin protein zero-like 3                                                       | -1.60              |
| 212631_at               | STX7                       | syntaxin 7                                                                       | -1.60              |
| 1555347_at              | PDXDC1                     | pyridoxal-dependent decarboxylase domain containing 1                            | -1.57              |
| 242780_at               | VAPA                       | VAMP (vesicle-associated membrane protein)-associated protein A, 33kDa           | -1.55              |
| 1569791_at              | STK4                       | serine/threonine kinase 4                                                        | -1.54              |
| 212262_at               | QKI                        | quaking homolog, KH domain RNA binding (mouse)                                   | -1.53              |
| 238226_at               | FAM70B                     | family with sequence similarity 70, member B                                     | -1.51              |
| 211506_s_at             | IL8                        | interleukin 8                                                                    | -1.51              |
| 206486_at               | LAG3                       | lymphocyte-activation gene 3                                                     | 1.51               |
| 204197_s_at             | RUNX3                      | runt-related transcription factor 3                                              | 1.51               |
| 205114_s_at             | CCL3 /// CCL3L1 /// CCL3L3 | chemokine (C-C motif) ligand 3 /// chemokine (C-C motif) ligand 3-like 1 /// che | 1.52               |
| 216598_s_at             | CCL2                       | chemokine (C-C motif) ligand 2                                                   | 1.53               |
| 236745_at               | CCDC78                     | coiled-coil domain containing 78                                                 | 1.53               |
| 225879_at               | TSEN54                     | tRNA splicing endonuclease 54 homolog (S. cerevisiae)                            | 1.53               |
| 219587_at               | TTC12                      | tetratricopeptide repeat domain 12                                               | 1.53               |
| 235175_at               | GBP4                       | guanylate binding protein 4                                                      | 1.53               |
| 206021_at               | SCAND2                     | SCAN domain containing 2 pseudogene                                              | 1.54               |
| 232222_at               | C18orf49                   | chromosome 18 open reading frame 49                                              | 1.55               |
| 220785_at               | UTS2                       | urotensin 2                                                                      | 1.56               |
| 203650_at               | PROCR                      | protein C receptor, endothelial (EPCR)                                           | 1.56               |
| 203281_s_at             | UBA7                       | ubiquitin-like modifier activating enzyme 7                                      | 1.56               |
| 1553261_x_at            | ALS2CR11                   | amyotrophic lateral sclerosis 2 (juvenile) chromosome region, candidate 11       | 1.59               |
| 213688_at               | CALM1                      | calmodulin 1 (phosphorylase kinase, delta)                                       | 1.61               |
| 205660_at               | OASL                       | 2'-5'-oligoadenylate synthetase-like                                             | 1.64               |
| 236717_at               | FAM179A                    | family with sequence similarity 179, member A                                    | 1.64               |
| 233157_x_at             | CCDC114                    | coiled-coil domain containing 114                                                | 1.65               |
| 204731_at               | TGFBR3                     | transforming growth factor, beta receptor III                                    | 1.68               |
| 1553185_at              | RASEF                      | RAS and EF-hand domain containing                                                | 1.68               |
| 229441_at               | PRSS23                     | Protease, serine, 23                                                             | 1.69               |
| 220784_s_at             | UTS2                       | urotensin 2                                                                      | 1.73               |
| 227835_at               | LOC100132181               | Hypothetical protein LOC100132181                                                | 1.76               |
| 227819_at               | LGR6                       | leucine-rich repeat-containing G protein-coupled receptor 6                      | 1.81               |
| 207509_s_at             | LAIR2                      | leukocyte-associated immunoglobulin-like receptor 2                              | 1.82               |
| 209728_at               | HLA-DRB4                   | major histocompatibility complex, class II, DR beta 4                            | 1.92               |
